# Supplementary material
Source: MDPI journal article supplement (https://www.mdpi.com/2311-553X/8/6/83)
Supplement: s1 [file s1]

CTGCTGCAAAGTCCATGCTACTGGAAGCCTCGAAGTAGGGGGGATTCTGT  
 TCTAGTCTTTGTCAAATCCCCTGCCCATGGCAGCACCAGGACCCAGTTG  
 GGGCTCCTTGGAAGTGGCAGGAAGGAATCGGGTGGGGAGACAGGCAGAGA  
 AGGGGGTCTGTGCAAAGACCAGGAGAAACCAGAGACAGGTCGTGGCGGGG  
 GCTGAGACCTTCACACAGGGCAGG**GGCCG**CCCCGGGGGGTTCTCCTTGTC  
 TTGCAGCCCCTGTGCAGGGCATCCTCAGAGCAGGGGCAGCCCAGGGCACC  
 GGGACGCCCAGGTGGAAGGTGACCTGCCATCCTGCAGCTTCACTTCCTGC  
 CGGGTGATTCGGTACCCCTGGTTGTGCCTGTGCTCAGTGGGCCAGGGTC  
 TAAGGGCTGTGAAGACTCAACATGCCCCACCTGCTACTTCTGAACACCA  
 GGCACTGGCTCTGAGACCCCCGGGCCTTGCTGGACATCTCCCCAGGTGTA  
 CTGGGCCAGGGGACAGGGGCCTGGCCATCCCAACACCCAGGAGCAAGCAG  
 CCGTCACTGCCCAGGTCCCCGAGGCCTGGAACACCTTCCTGCTGGGCC  
 CACCCAGCCCTGGACCTGTCCCGCTTGGTCACACGATGGGACCCTCGGCC  
 CATCAGCAGgtgagccccaggagcgtgctgctggtgtaaggcctcc  
 accccaggagtgtggggggccccgtgccaggagcaggaggctgccagg  
 tggagggtcccacacagctaccactccctatccccagcacagcctggggc  
 ctggctctgagtacacatcctggggcctggctctgag**cagac**caagagcc  
 catccctgctttgtgacccccctgggctgtgcctgacaccccagggtgtcca  
 gcgtggagctggggcccagctcagtgcctgggagctgatggaccctgggg  
 cccggctcagtgcctggtggtgatggacactggggcctgggtcaaact  
 gcaccgtgtggtcgggggaggggagggctgagccacgtggggaccccag  
 cccagtgacgactctttgcggtggccaagccctccagggtgtccccagg  
 gctgaggggctgggcttggggcagctggtgacagcagatggtggccctga  
 tcaactggtgcctggacggcctctgaaggggtctgtggggctcctggacggg  
 tccccattcatggcaggattaacccccctcgggttctgtgtggtctaggc  
 cgccccctttgtctccactgccccctggccagaatgagggaacagtgaacca  
 ccagggtgtggcctggct**cagact**ccgtcagagccgcagggaagtcc  
 tggcacgtccgaggtgggaggctcctctgcgctccaggaggctgtgcctg  
 gcccccttcccggcaggaaccggctgtgtccctttccttcttcttctt  
 ctgttttcagCGCCTTCAACTGTGAAGAGGTGAACTCTTCAAAC**ACGCTG**  
**AGCAAACAGGCC**CGACTCCCAG**GGCCG**CATCCGGGATGTCTCAATAGCTG  
 TGGCCTTGACGTCCACCTCGGACCCCTGCCCCGGACCCAGCCAGTTCCC  
 AATGGGCCCTCTGCCCCGGGAGGTGCCTAGTGGGAGGGACGAGGGCAAAG  
 TCGGGGCCCCCACTTGTTTGGTGTCACTGTGTGCCAGCGGCCACTGGCGG  
 GCGAGGCTGTTCC

Figure S1: **AC061979.1 - DNA Sequence.** Uper case letters - exons; lower case letters - intron; green highlight - SMAD2/3 binding motif; pink highlight - FOXA2 binding motif.
