# Supplementary material
Source: MDPI journal article supplement (https://www.mdpi.com/2311-553X/8/6/83)
Supplement: s1 [file s1]

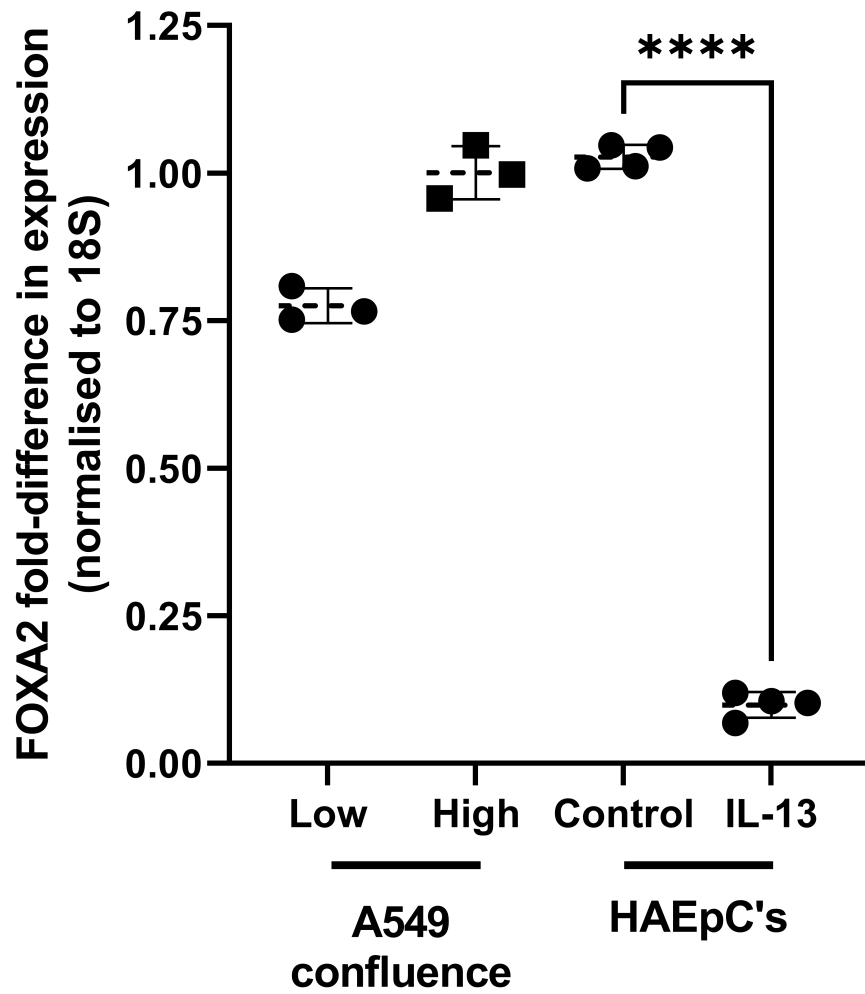

Figure S2: **FOXA2** expression levels in A549 and HAEpC's. The levels of FOXA2 mRNA were determined in A549 cells at low and high confluence levels and HAEpC's with and without IL-13 stimulation. Expression, normalised to 18S rRNA levels, was calculated relative to high confluence A549s or paired unstimulated HAEpC's. \*\*\*\*\*:  $p < 0.0001$ .
